# Supplementary material
Source: Frontiers journal article supplement (https://www.frontiersin.org/articles/311608)
Supplement: Table_1.PDF [file Table_1.PDF]

**Table S1.** Plackett-Burman design and calculation of the effect of physical-chemical parameters on enzyme activity.

| Plackett-Burman desing |    |    |    |    |     |    |     | Rate (nn min <sup>-1</sup> ) |      |      |
|------------------------|----|----|----|----|-----|----|-----|------------------------------|------|------|
| Assay                  | V1 | V2 | V3 | V4 | SV1 | V5 | SV2 | GOD                          | Inv  | ALP  |
| 1                      | +  | +  | +  | -  | +   | -  | -   | 2.80                         | 0.19 | 0.20 |
| 2                      | -  | +  | +  | +  | -   | +  | -   | 11.90                        | 0.33 | 0.02 |
| 3                      | -  | -  | +  | +  | +   | -  | +   | 2.35                         | 0.66 | 0.03 |
| 4                      | +  | -  | -  | +  | +   | +  | -   | 0.60                         | 0.05 | 0.05 |
| 5                      | -  | +  | -  | -  | +   | +  | +   | 6.35                         | 0.07 | 0.13 |
| 6                      | +  | -  | +  | -  | -   | +  | +   | 3.80                         | 0.13 | 0.06 |
| 7                      | +  | +  | -  | +  | -   | -  | +   | 0.80                         | 0.23 | 0.06 |
| 8                      | -  | -  | -  | -  | -   | -  | -   | 0.50                         | 0.75 | 0.06 |

  

| Factors and effect on each enzyme activity |                        |     |     |     |                                   |     |     |     |                        |   |    |     |
|--------------------------------------------|------------------------|-----|-----|-----|-----------------------------------|-----|-----|-----|------------------------|---|----|-----|
|                                            | GOD                    |     |     |     | Inv                               |     |     |     | ALP                    |   |    |     |
|                                            | Factor                 | -   | +   | E   | Factor                            | -   | +   | E   | Factor                 | - | +  | E   |
| V1                                         | pH                     | 4.6 | 6.6 | 6.3 | pH                                | 4.6 | 6.6 | 5.9 | pH                     | 8 | 10 | 0.4 |
| V2                                         | Temp. (°C)             | 27  | 47  | 6.3 | Temp. (°C)                        | 27  | 47  | 5.9 | Temp. (°C)             | 4 | 22 | 0.4 |
| V3                                         | Glucose (%)            | 1   | 20  | 5,8 | H <sub>2</sub> O <sub>2</sub> (%) | 0   | 0.1 | 0.2 | ZnSO <sub>4</sub> (mM) | 0 | 5  | 0   |
| V4                                         | FeSO <sub>4</sub> (mM) | 0   | 0.2 | 0.2 | Urea (M)                          | 0   | 0.4 | 0.1 | MgCl <sub>2</sub> (mM) | 0 | 5  | 1.9 |
| V5                                         | CaCl <sub>2</sub> (M)  | 0   | 1   | 9.7 | Ethanol (%)                       | 0   | 8   | 6.3 | L-phenylalanine        | 0 | 10 | 0.2 |

PB, Plackett-Burman design. V, variable; SV1 and SV2, simulated variables; -, low value; +, high value. E, effect of each variable calculated according too Plackett-burmant design.

\*, the physical-chemical parameters and the ranges evaluated for each enzyme activity are indicated. - and +, mean low and high values for each variable. 0 values means no addition of respective compounds. For each assay de progress curve was determined, follow the product formation by GOD, Inv and ALP, by the absorbance at 500 nm, 540 nm and 405 nm, respectively. Rate was calculated from initial period in each case.
